# Supplementary material for: Physical gelation of AB-alternating copolymers made of vinyl phenol and maleimide units: cooperation between precisely incorporated phenol and long alkyl pendant groups
Source: Royal Society of Chemistry journal article supplement (doi:10.1039/c9py00329k), 2019-01-01
Supplement: c9py00329k1.pdf [file c9py00329k1.pdf]

## Supporting Information

### Physical Gelation of AB-Alternating Copolymers Made of Vinyl Phenol and Maleimide Units: Cooperation between Precisely Incorporated Phenol and Long Alkyl Pendant Groups

*Kana Nishimori,<sup>1</sup> Esther Cazares-Cortes,<sup>2</sup> Jean-Michel Guigner,<sup>3</sup> Francois Tournilhac,<sup>2\*</sup> and Makoto Ouchi<sup>1\*</sup>*

<sup>1</sup>Department of Polymer Chemistry, Graduate School of Engineering, Kyoto University, Katsura Nishikyo-ku, Kyoto 615-8510, Japan

<sup>2</sup> Molecular, Macromolecular Chemistry, and Materials, CNRS, ESPCI-Paris, PSL Research University, 10 rue Vauquelin 75005 Paris, France

<sup>3</sup> Institut de Minéralogie, de Physique des Matériaux et de Cosmochimie, Sorbonne Université, CNRS, UMR 7590, IRD, MNHN, 4 place Jussieu, F-75005 Paris, France

\*Correspondence to: [ouchi@living.polym.kyoto-u.ac.jp](mailto:ouchi@living.polym.kyoto-u.ac.jp)

\*Correspondence to: [francois.tournilhac@espci.fr](mailto:francois.tournilhac@espci.fr)

#### Contents

|                                                                                                         |            |
|---------------------------------------------------------------------------------------------------------|------------|
| <b>Table S1-S2.</b> Characterization of alternating copolymers                                          | <b>P2</b>  |
| <b>Figure S1-S2.</b> SEC curves and FT-IR spectra of alternating copolymers after deprotection          | <b>P3</b>  |
| <b>Figure S3-S5.</b> <sup>1</sup> H NMR spectra of alternating copolymers before and after deprotection | <b>P5</b>  |
| <b>Figure S6.</b> MALDI-TOF-MS spectrum of <b>Alt-C12</b>                                               | <b>P6</b>  |
| <b>Figure S7.</b> <sup>1</sup> H NMR spectra of 5wt% <b>Alt-C18</b> gel in toluene-d <sub>8</sub>       | <b>P7</b>  |
| <b>Table S3.</b> Viscosities of 5wt% <b>Alt-C12</b> solutions                                           | <b>P8</b>  |
| <b>Figure S8.</b> DSC thermograms for bulk <b>Alt-C12</b> and <b>Alt-C18</b>                            | <b>P9</b>  |
| <b>Figure S9.</b> Chem3D molecular models for repeat unit of <b>Alt-C12</b> and <b>Alt-C18</b>          | <b>P9</b>  |
| <b>Figure S10.</b> WAXD data of freeze dried <b>Alt-C12</b> and <b>Alt-C18</b>                          | <b>P10</b> |
| <b>Figure S11.</b> SANS data with fitting curves                                                        | <b>P11</b> |
| <b>Figure S12.</b> SAXS data with fitting curves                                                        | <b>P12</b> |
| <b>Table S4.</b> SAXS data of 5wt% <b>Alt-C18</b> solutions in toluene-d <sub>8</sub>                   | <b>P13</b> |

**Table S1.** Characterization of Alternating Copolymers with tBOS and *N*-Alkylmaleimides Synthesized by Free Radical Copolymerization

| Entry <sup>a</sup> | MI Derivatives | Conv., % <sup>b</sup> |     | Composition Ratio <sup>c</sup><br>tBOS/MI | $M_n^d$<br>(GPC) | $M_w/M_n^d$<br>(GPC) |
|--------------------|----------------|-----------------------|-----|-------------------------------------------|------------------|----------------------|
|                    |                | tBOS                  | MI  |                                           |                  |                      |
| 1                  | C18MI          | 97                    | 98  | 49/51                                     | 190000           | 3.44                 |
| 2                  | C12MI          | 98                    | 99  | 49/51                                     | 91900            | 6.45                 |
| 3                  | C8MI           | 96                    | 100 | 49/51                                     | 154200           | 2.46                 |
| 4                  | C2MI           | 93                    | 99  | 50/50                                     | 75300            | 5.33                 |

<sup>a</sup> Conditions: [tBOS]<sub>0</sub>/[MI]<sub>0</sub>/[AIBN]<sub>0</sub> = 1000/1000/20 mM in toluene at 60 °C (Entries 1-4).

<sup>b</sup> Conversions of tBOS and MI derivatives were determined by <sup>1</sup>H NMR.

<sup>c</sup> Composition Ratio of tBOS and MI derivatives was determined by <sup>1</sup>H NMR after purification.

<sup>d</sup> Determined by GPC in THF with PSt standard calibration (before deprotection reaction).

**Table S2.** Characterization of Alternating Copolymers with tBOS and *N*-Dodecylmaleimide (C12MI) Synthesized by RAFT Polymerization

| Entry <sup>a</sup> | Conc., mM |       | Conv., % <sup>b</sup> |       | DP <sup>c</sup><br>(calcd.) | Composition Ratio <sup>d</sup><br>tBOS/C12MI | $M_n^e$<br>(GPC) | $M_w/M_n^e$<br>(GPC) |
|--------------------|-----------|-------|-----------------------|-------|-----------------------------|----------------------------------------------|------------------|----------------------|
|                    | tBOS      | C12MI | tBOS                  | C12MI |                             |                                              |                  |                      |
| 1                  | 1000      | 1000  | 95                    | 97    | 190                         | 49/51                                        | 54300            | 1.32                 |
| 2                  | 1000      | 1000  | 94                    | 96    | 95                          | 48/52                                        | 31000            | 1.23                 |
| 3                  | 500       | 500   | 90                    | 91    | 45                          | 49/51                                        | 18700            | 1.20                 |
| 4                  | 300       | 300   | 96                    | 99    | 29                          | 48/52                                        | 12100            | 1.17                 |
| 5                  | 100       | 100   | 100                   | 100   | 10                          | 50/50                                        | 5100             | 1.11                 |

<sup>a</sup> Conditions: [CTA]<sub>0</sub>/[AIBN]<sub>0</sub> = 5/1 mM (Entry 1) and 10/1 mM (Entries 2-5) in toluene at 60 °C.

<sup>b</sup> Conversions of tBOS and C12MI were determined by <sup>1</sup>H NMR.

<sup>c</sup> The average DPs of tBOS and C12MI in copolymers were determined by monomer conversions.

<sup>d</sup> Composition Ratio of tBOS and C12MI was determined by <sup>1</sup>H NMR after purification.

<sup>e</sup> Determined by GPC in THF with PSt standard calibration (before deprotection reaction).

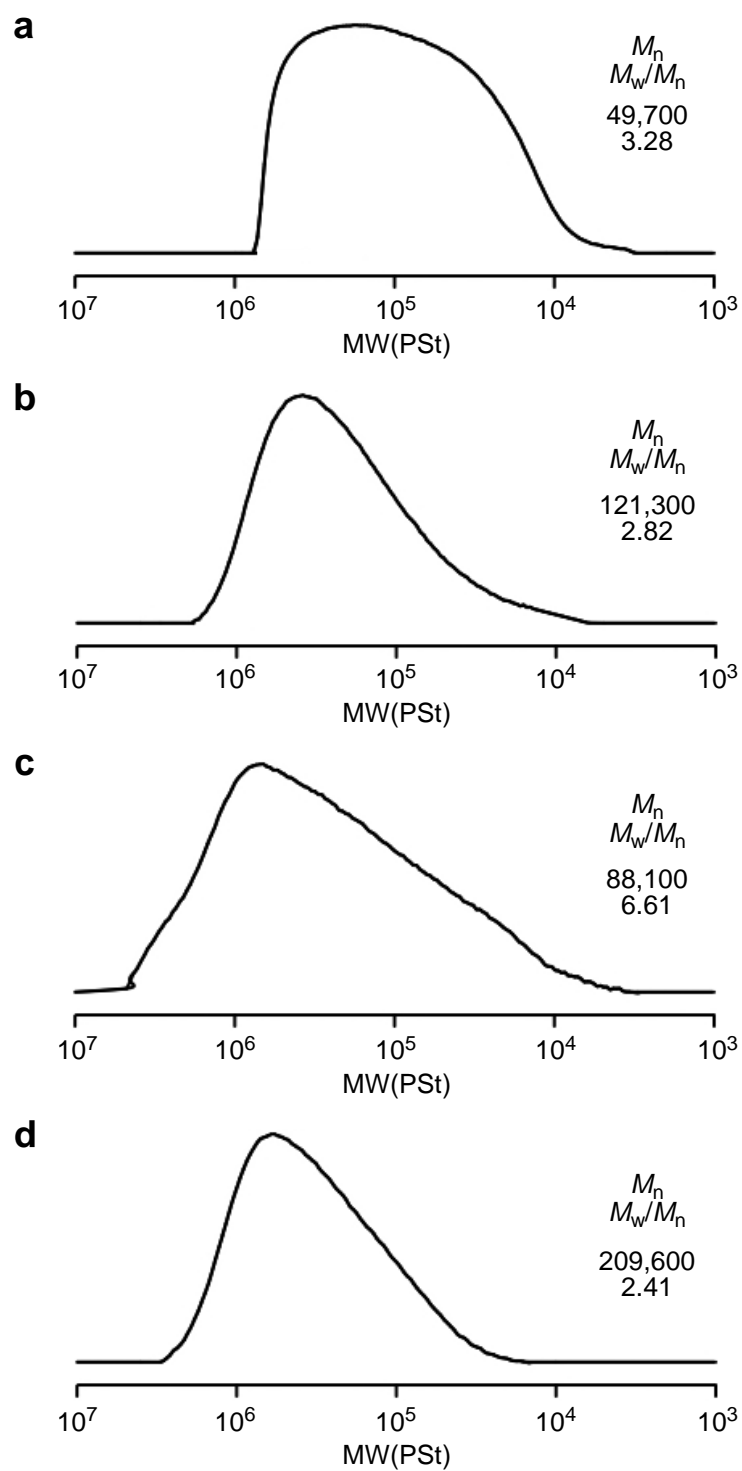

**Figure S1.** SEC curves of (a) **Alt-C2**, (b) **Alt-C8**, (c) **Alt-C12** and (d) **Alt-C18** in THF.

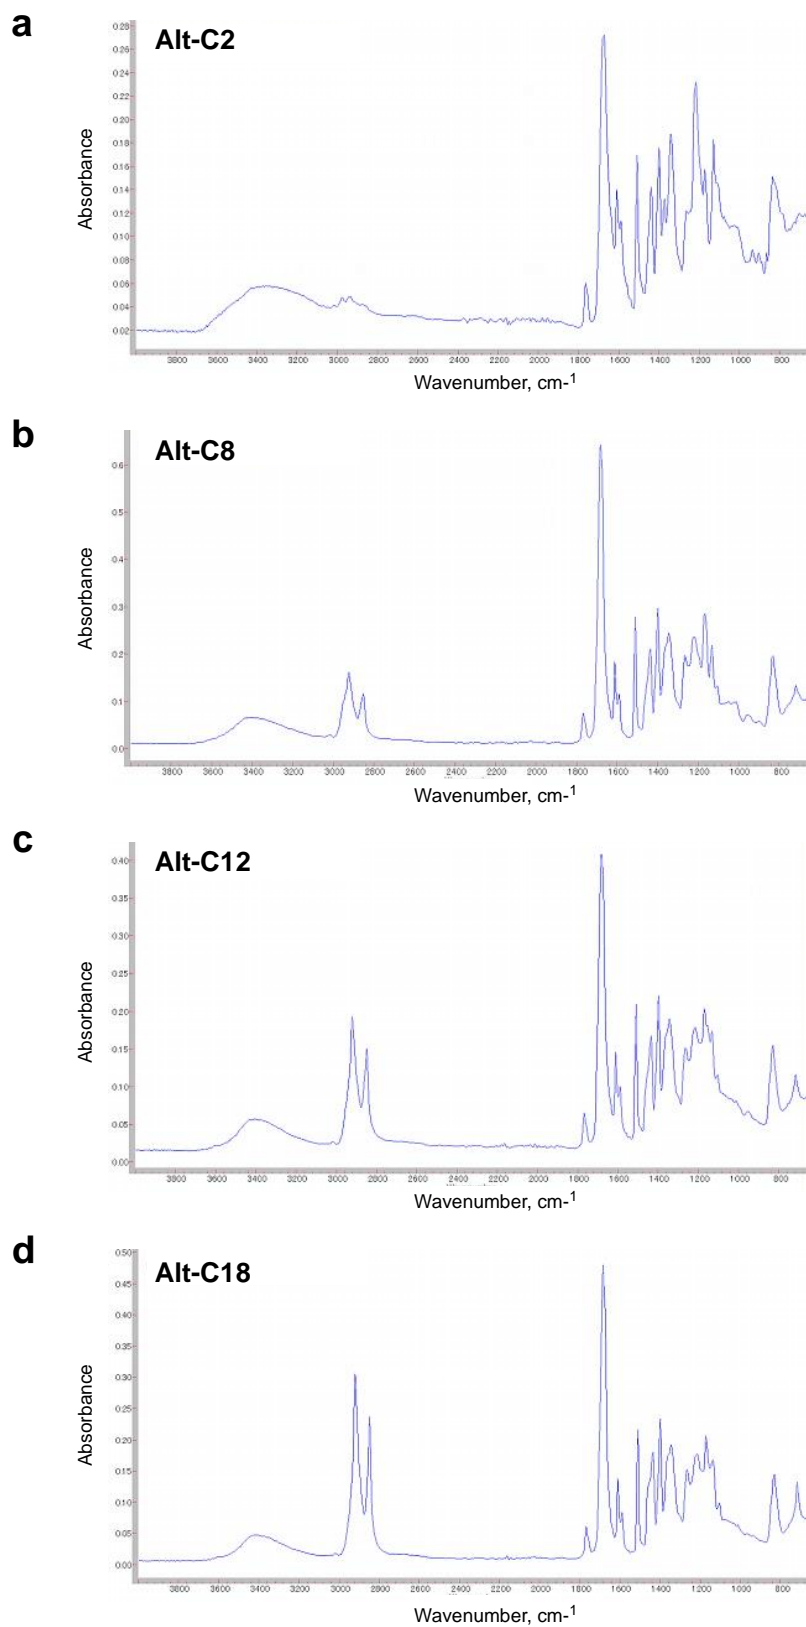

**Figure S2.** FT-IR spectra of (a) **Alt-C2**, (b) **Alt-C8**, (c) **Alt-C12** and (d) **Alt-C18**.

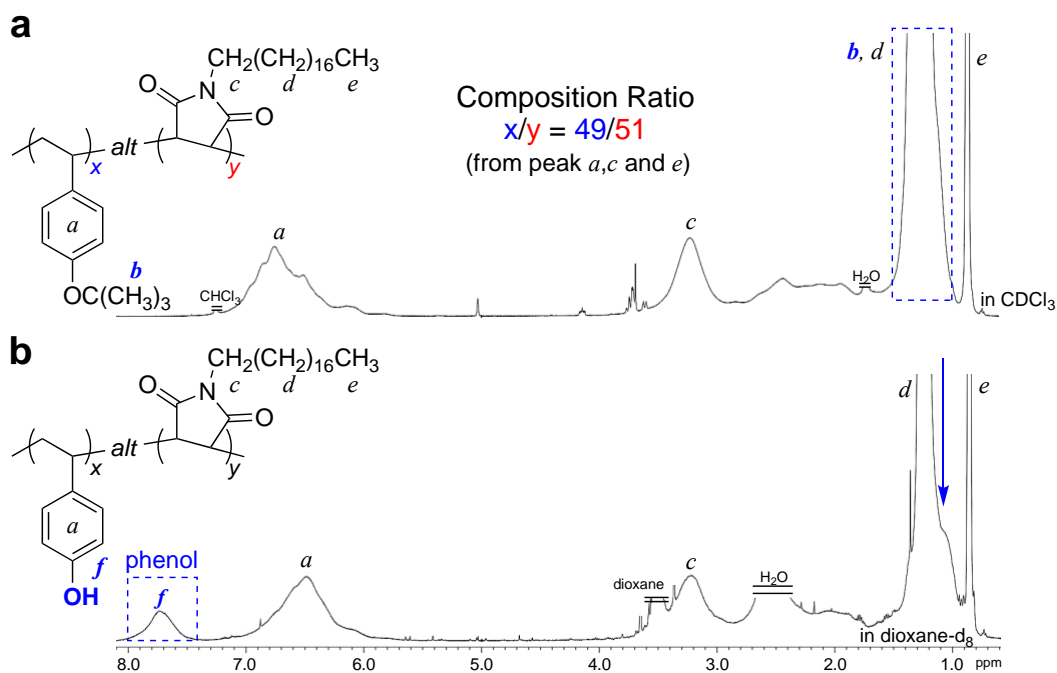

**Figure S3.**  $^1\text{H}$  NMR spectra of the copolymer with tBOS and C18MI (a,  $\text{CDCl}_3$ ) and the copolymer after deprotection reaction (b, 1,4-dioxane- $\text{d}_8$ ).

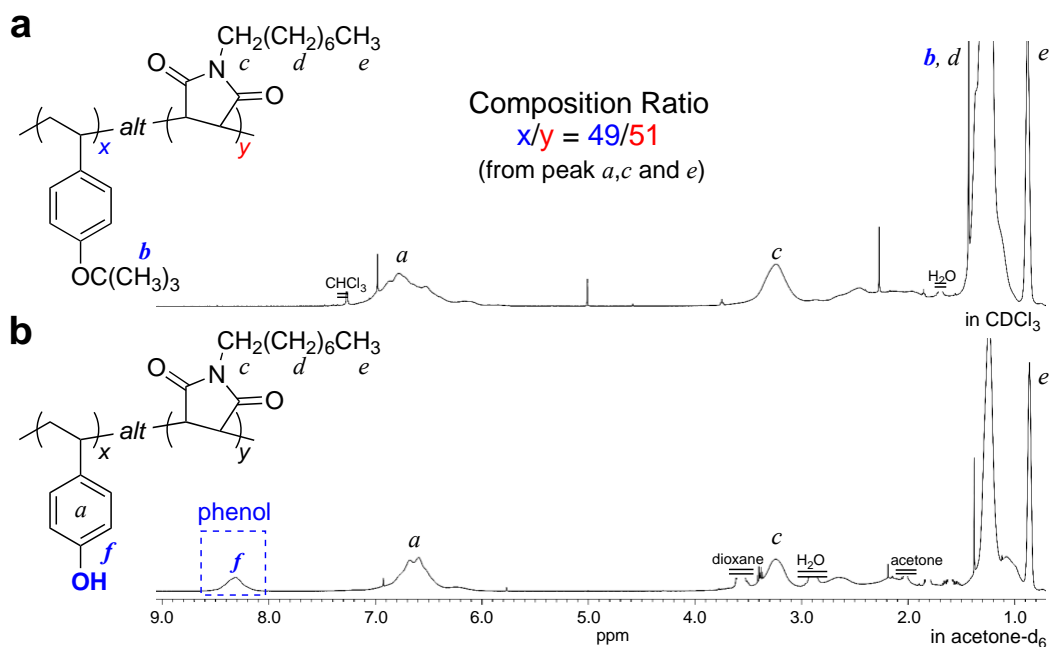

**Figure S4.**  $^1\text{H}$  NMR spectra of the copolymer with tBOS and C8MI (a,  $\text{CDCl}_3$ ) and the copolymer after deprotection reaction (b, acetone- $\text{d}_6$ ).

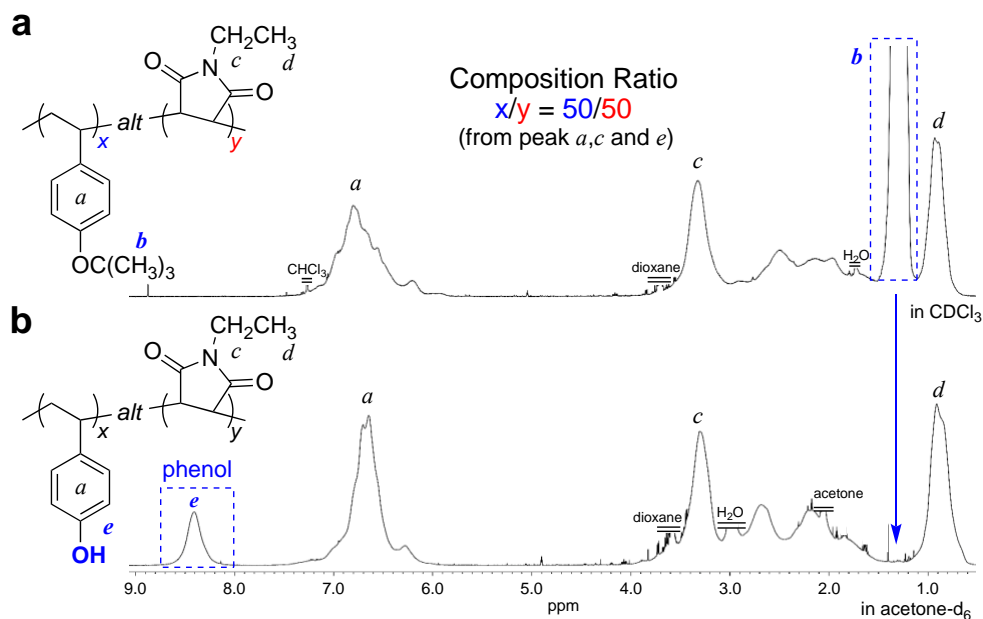

**Figure S5.**  $^1\text{H}$  NMR spectra of the copolymer with tBOS and C2MI (a,  $\text{CDCl}_3$ ) and the copolymer after deprotection reaction (b,  $\text{acetone-d}_6$ ).

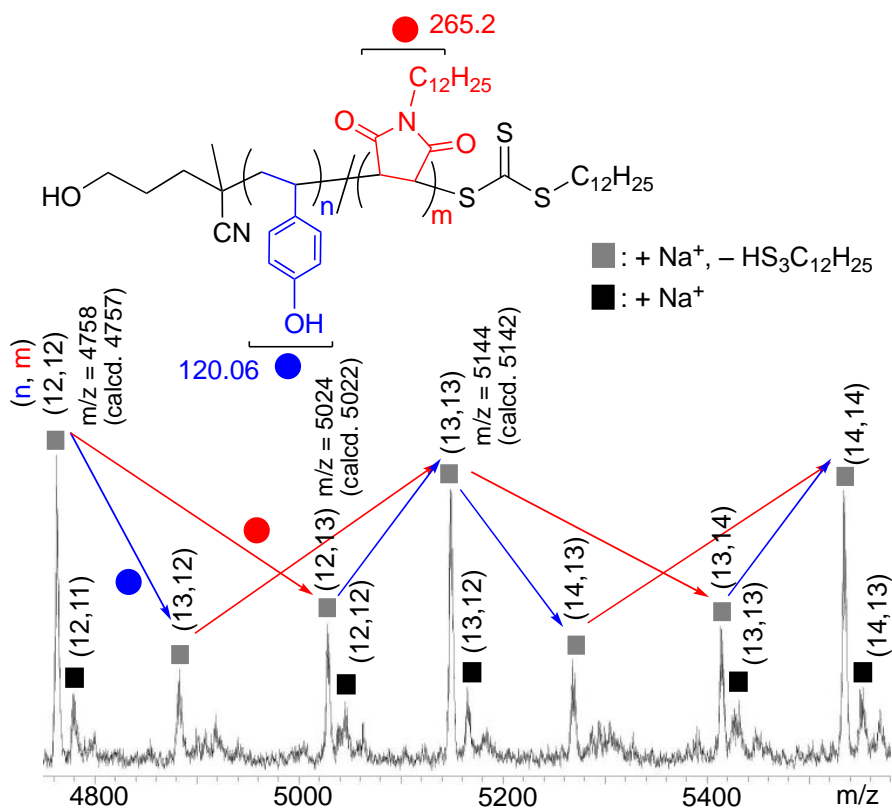

**Figure S6.** MALDI-TOF-MS spectrum of Alt-C12 ( $M_n = 18200$ ,  $M_w/M_n = 1.22$ ) synthesized by RAFT copolymerization.

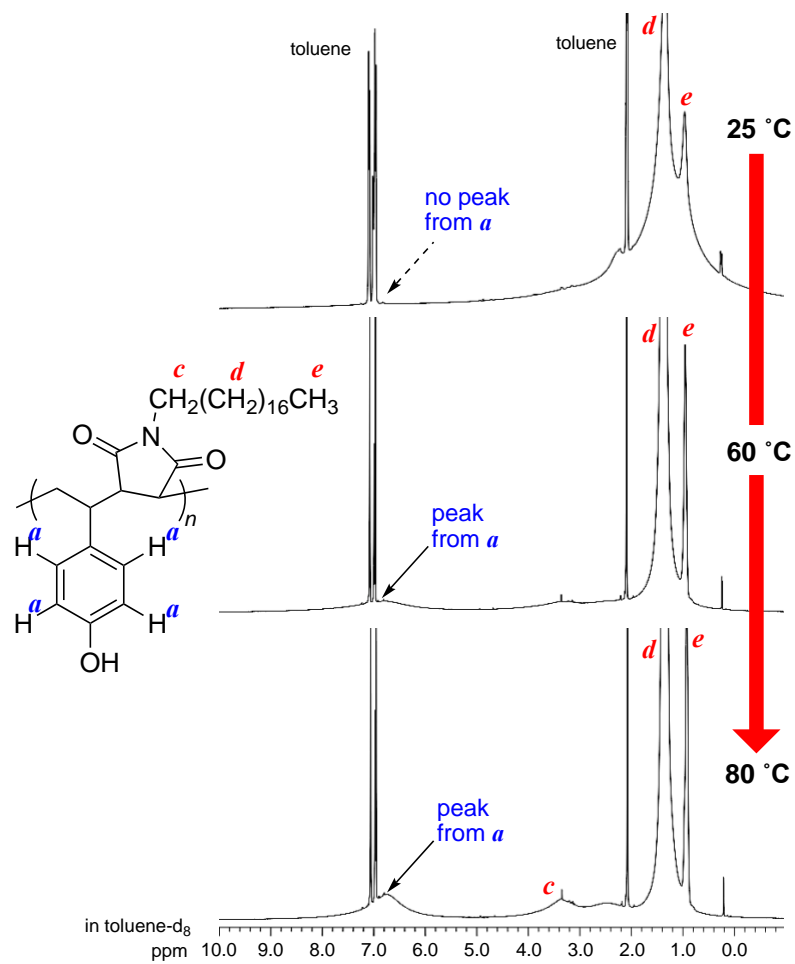

**Figure S7.**  $^1\text{H}$  NMR spectra of 5wt% **Alt-C18** gel in  $\text{toluene-d}_8$  at 25 °C, 60 °C and 80 °C.

**Table S3.** Viscosity of the Solution of **Alt-C12** in Toluene (5wt%) After Addition of Pyridine in Comparison with the Solution in THF (5wt%)

| Angle (°)      | Viscosity (mPa·s)                                     |              |
|----------------|-------------------------------------------------------|--------------|
|                | In Toluene<br>After Addition of Pyridine <sup>a</sup> | In THF       |
| 20             | 8.35                                                  | 10.19        |
| 25             | 8.29                                                  | 10.17        |
| 30             | 8.26                                                  | 10.22        |
| 35             | 8.29                                                  | 10.25        |
| 40             | 8.33                                                  | 10.32        |
| 45             | 8.36                                                  | 10.39        |
| 50             | 8.41                                                  | 10.44        |
| 55             | 8.44                                                  | 10.50        |
| 60             | 8.48                                                  | 10.53        |
| 65             | 8.46                                                  | 10.51        |
| 70             | 8.36                                                  | 10.40        |
| <b>Average</b> | <b>8.37</b>                                           | <b>10.36</b> |

<sup>a</sup> The amount of pyridine added in toluene solution was 2 equimolar with phenol groups in the solution.



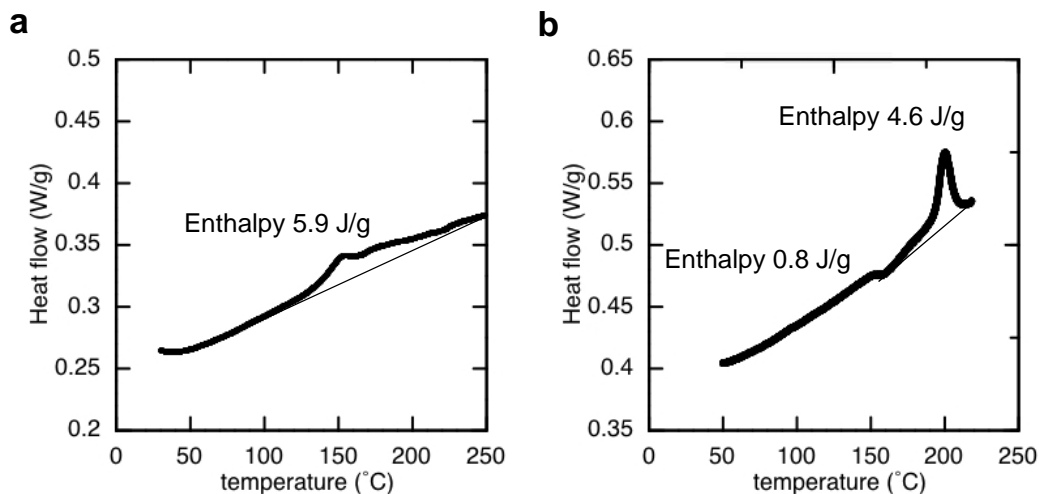

**Figure S8.** DSC thermograms recorded at 2nd heating process for bulk samples of (a) **Alt-C12** and (b) **Alt-C18**. Temperature program: 1st heating at 10 °C/min from 20 °C to 250 °C; 5 min holding at 250 °C; 1st cooling at 10 °C/min from 250 °C to 20 °C; 2nd heating at 10 °C/min from 20 °C to 250 °C.

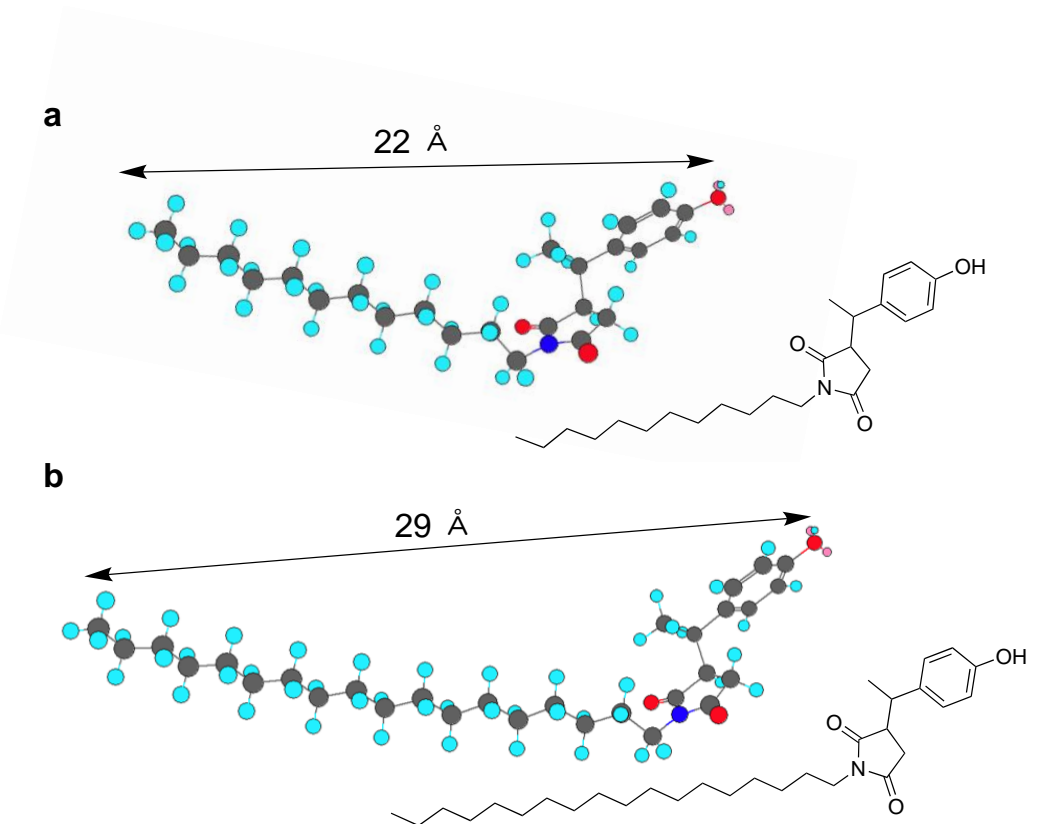

**Figure S9.** Chem3D Molecular models of dimers of 4-vinylphenol and *N*-alkylmaleimide (a, C12MI; b, C18MI) with alkyl chains in the fully extended conformation.

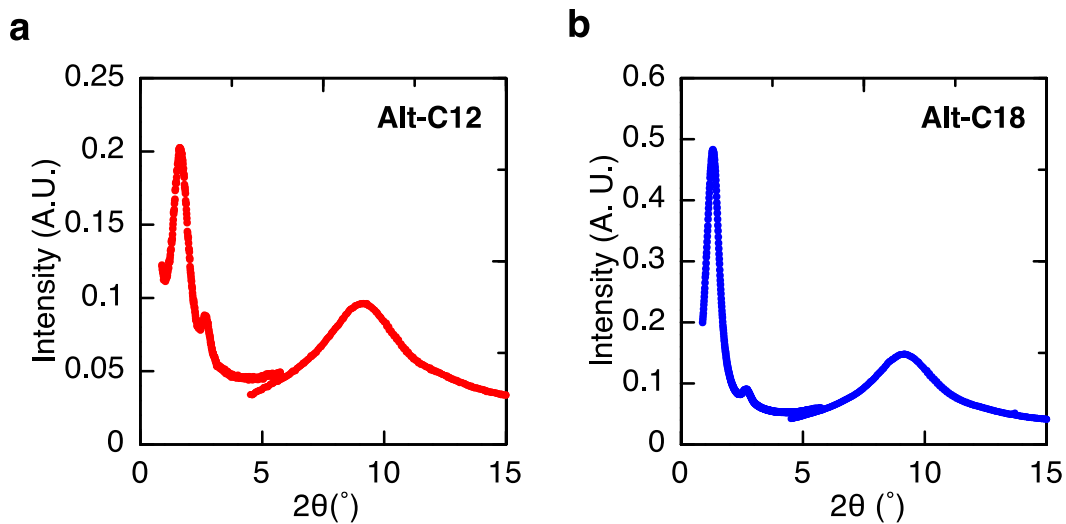

**Figure S10.** Wide angle X-ray diffraction patterns of freeze dried bulk **Alt-C12** (a) and **Alt-C18** (b). The peak arising at  $2\theta = 2.7^\circ$  is due to Kapton windows.

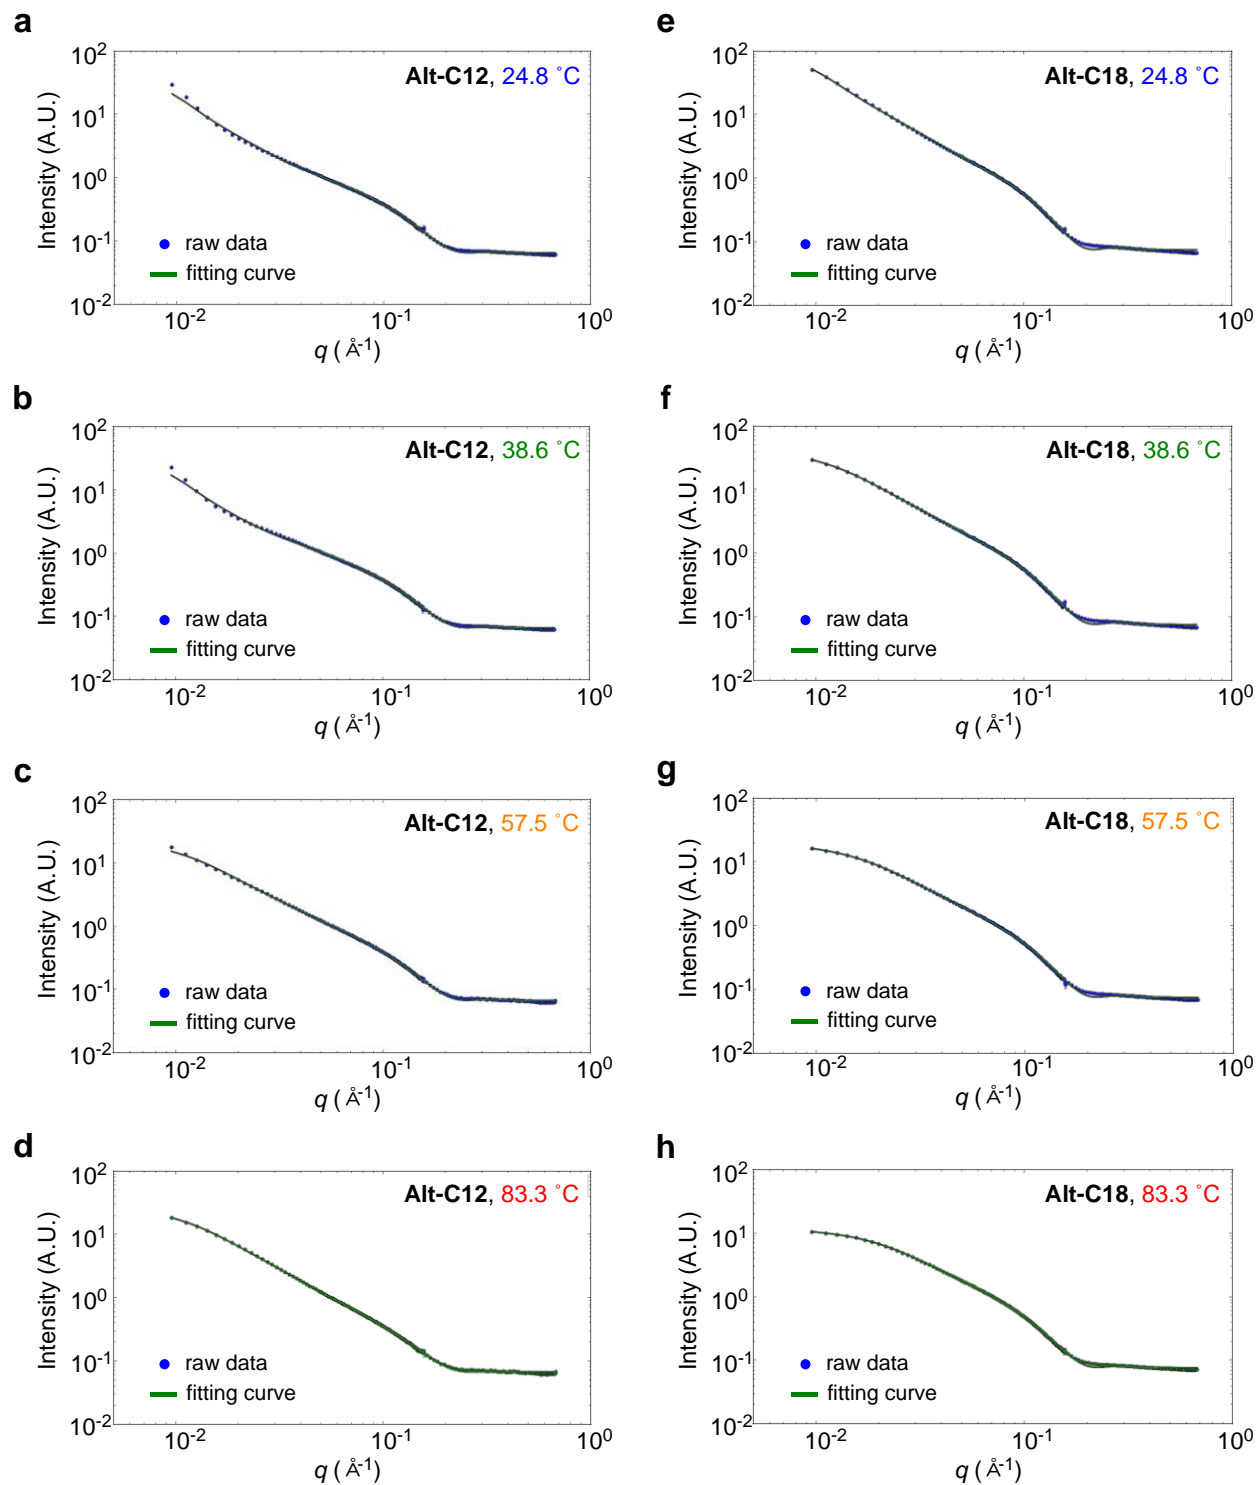

**Figure S11.** SANS data with fitting curves for Alt-C12 (a-d) and Alt-C18 (e-f).

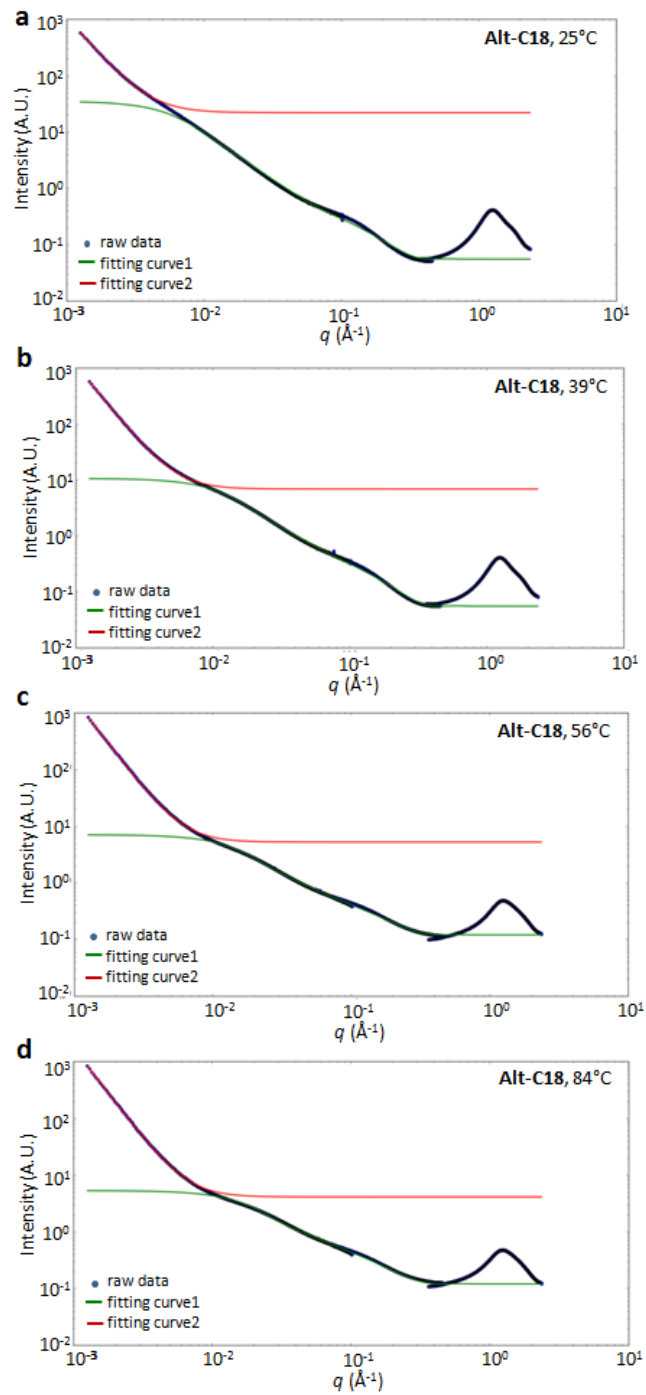

**Figure S12.** SAXS data with fitting curves for **Alt-C18** (a-d) at different temperatures. The fitting curve1 (green) correspond to a flexible cylinder model fitted from 0.01 to 0.5  $\text{\AA}^{-1}$ . The fitting curve2 (red) correspond to a shape unique power law model fitted from 0.001 to 0.01  $\text{\AA}^{-1}$ .

**Table S4.** Fitting Parameters from Modeling of SAXS Data Recorded at Various Temperatures of 5wt% **Alt-C18** Solutions in Toluene-d<sub>8</sub>

| Sample         | flexible cylinder |                |                 |                    |                                | power law |                                |
|----------------|-------------------|----------------|-----------------|--------------------|--------------------------------|-----------|--------------------------------|
|                | Temperature (°C)  | Av. Radius (Å) | Kuhn length (Å) | Contour length (Å) | Background (cm <sup>-1</sup> ) | power     | Background (cm <sup>-1</sup> ) |
| <b>Alt-C18</b> | 84                | 8.48           | 140.4           | 429.0              | 0.12                           | 3.19      | 4.11                           |
|                | 56                | 8.51           | 103.4           | 634.6              | 0.12                           | 3.17      | 5.23                           |
|                | 39                | 8.50           | 76.0            | 1092.5             | 0.05                           | 3.03      | 6.87                           |
|                | 25                | 8.50           | 58.3            | 4000.0             | 0.05                           | 2.80      | 21.96                          |
